# Supplementary material
Source: publisher figshare collection journal article supplement (https://gsajournals.figshare.com/ndownloader/files/20973675)
Supplement: Supplementary file 1 [file 20973675]

## Sheet: Table S7
Table S7	M. jurtina genome annotation summary
Properties	Value
Number of genes	36226
Number of mrnas	38067
Number of mrnas with utr both sides	404
Number of mrnas with at least one utr	2663
Number of cdss	38067
Number of exons	177284
Number of five prime utrs	1799
Number of introns	142284
Number of start codons	36008
Number of stop codons	36485
Number of three prime utrs	1268
Number of exon in cds	177284
Number of exon in five prime utr	1799
Number of exon in three prime utr	1268
Number of intron in cds	139217
Number of intron in exon	139217
Number of intron in intron	111757
Number of single exon gene	8433
Number of single exon mrna	8509
mean mrnas per gene	1.1
mean cdss per mrna	1
mean exons per mrna	4.7
mean five prime utrs per mrna	0
mean introns per mrna	3.7
mean start codons per mrna	0.9
mean stop codons per mrna	1
mean three prime utrs per mrna	0
mean exons per cds	4.7
mean exons per five prime utr	1
mean exons per three prime utr	1
mean introns in cdss per mrna	3.7
mean introns in exons per mrna	3.7
mean introns in introns per mrna	2.9
Total gene length	150339799
Total mrna length	167875458
Total cds length	37192228
Total exon length	39884925
Total five prime utr length	1833292
Total intron length	130683230
Total start codon length	108024
Total stop codon length	109455
Total three prime utr length	859405
Total intron length per cds	128129750
Total intron length per exon	128129750
Total intron length per intron	20463359
mean gene length	4150
mean mrna length	4409
mean cds length	977
mean exon length	224
mean five prime utr length	1019
mean intron length	918
mean start codon length	3
mean stop codon length	3
mean three prime utr length	677
mean cds piece length	209
mean five prime utr piece length	1019
mean three prime utr piece length	677
mean intron in cds length	920
mean intron in exon length	920
mean intron in intron length	183
Longest genes	93735
Longest mrnas	93735
Longest cdss	57939
Longest exons	11979
Longest five prime utrs	8414
Longest introns	36945
Longest start codons	3
Longest stop codons	3
Longest three prime utrs	5878
Longest cds piece	11979
Longest five prime utr piece	8414
Longest three prime utr piece	5878
Longest intron into cds part	36946
Longest intron into exon part	36946
Longest intron into intron part	11980
Shortest genes	152
Shortest mrnas	152
Shortest cdss	40
Shortest exons	3
Shortest five prime utrs	35
Shortest introns	6
Shortest start codons	3
Shortest stop codons	3
Shortest three prime utrs	6
Shortest cds piece	3
Shortest five prime utr piece	35
Shortest three prime utr piece	6
Shortest intron into cds part	43
Shortest intron into exon part	43
Shortest intron into intron part	7
